# Supplementary material for: Theory of methane emission from wetlands
Source: Royal Society of Chemistry journal article supplement (doi:10.1039/b923456j), 2010-01-01
Supplement: b923456j.pdf [file b923456j.pdf]

**Table 1:** Parameters of the active layer for the exponential dependence of methane generation rate on depth.

| $\tilde{v}$                                | 0                   | 0.1   | 0.2   | 0.3   | 0.4   | 0.5    | 0.6   | 0.7   | 0.8   | 0.9   | 1.0   | 1.1   | 1.15  | 1.2   | 1.3   | 1.4   |
|--------------------------------------------|---------------------|-------|-------|-------|-------|--------|-------|-------|-------|-------|-------|-------|-------|-------|-------|-------|
| $\tilde{C}_1 _{z \rightarrow \tilde{h}}$   | 1.0                 | 1.0   | 0.99  | 0.99  | 0.98  | 0.95   | 0.92  | 0.87  | 0.808 | 0.74  | 0.67  | 0.605 | 0.573 | 0.544 | 0.488 | 0.439 |
| $\tilde{C}_2 _{z \rightarrow \tilde{H}}$   | 0.0                 | 0.0   | 0.0   | 0.0   | 0.01  | 0.0215 | 0.04  | 0.06  | 0.09  | 0.12  | 0.15  | 0.182 | 0.197 | 0.211 | 0.236 | 0.259 |
| $\tilde{h}$                                | 0.663               | 0.678 | 0.695 | 0.712 | 0.730 | 0.750  | 0.772 | 0.795 | 0.821 | 0.848 | 0.879 | 0.914 | 0.933 | 0.953 | 0.997 | 1.048 |
| Tangent<br>$\ln \tilde{h} \div \ln(1-r_2)$ | 0.5                 | 0.5   | 0.53  | 0.55  | 0.57  | 0.59   | 0.63  | 0.66  | 0.7   | 0.77  | 0.87  | 0.97  |       | 0.88  |       |       |
| $\tilde{Z}_{0.5}$                          | 0.55                | 0.55  | 0.59  | 0.6   | 0.65  | 0.65   | 0.66  | 0.65  | 0.61  | 0.58  | 0.57  | 0.55  | 0.53  | 0.50  | 0.47  | 0.45  |
| $\tilde{t}_1$                              | 0.773               | 0.812 | 0.843 | 0.875 | 0.905 | 0.926  | 0.93  | 0.933 | 0.926 | 0.881 | 0.805 | 0.79  | 0.726 | 0.742 | 0.702 | 0.66  |
| $-\tilde{J}_{1D} = \tilde{A}_1$            | 1.2                 | 1.17  | 1.139 | 1.108 | 1.076 | 1.042  | 1.006 | 0.968 | 0.927 | 0.883 | 0.839 | 0.796 | 0.774 | 0.753 | 0.713 | 0.675 |
| $\tilde{J}_{2D} = -\tilde{A}_2 q_2$        | 0.263               | 0.25  | 0.241 | 0.230 | 0.217 | 0.205  | 0.191 | 0.177 | 0.160 | 0.142 | 0.125 | 0.108 | 0.099 | 0.091 | 0.076 | 0.062 |
| $\tilde{J}_1$                              | $\tilde{H}$         | 10.0  | 5.0   | 3.33  | 2.5   | 2.0    | 1.67  | 1.43  | 1.250 | 1.11  | 1.0   | 0.909 | 0.870 | 0.833 | 0.769 | 0.714 |
| $\tilde{J}_{1B}$                           | $\tilde{H}^{-1.2}$  | 8.83  | 3.86  | 2.23  | 1.43  | 0.96   | 0.66  | 0.46  | 0.32  | 0.23  | 0.16  | 0.114 | 0.095 | 0.80  | 0.056 | 0.039 |
| $X_{1B}$                                   | 1                   | 0.97  | 0.94  | 0.91  | 0.67  | 0.82   | 0.78  | 0.72  | 0.67  | 0.62  | 0.56  | 0.513 | 0.49  | 0.468 | 0.426 | 0.389 |
| $Y_{1B}$                                   | $1 - 1.2/\tilde{H}$ | 0.88  | 0.77  | 0.67  | 0.57  | 0.48   | 0.40  | 0.32  | 0.259 | 0.21  | 0.16  | 0.125 | 0.11  | 0.096 | 0.073 | 0.055 |

**Table 2:** Parameters of wetlands calculated from data<sup>23</sup>

| N of place                   | Latitude °N | $v$ , $\text{cm}^{-1}$ | $1/v$ , cm | $J_0 \cdot 10^{12}$ , mole/ $(\text{cm}^2 \cdot \text{s})$ | $W_{10} \cdot 10^{12}$ , mole/ $(\text{cm}^3 \cdot \text{s})$ | $l$ , cm | $\tilde{v}$ | $\tilde{h}$ | $h$ , cm   | Part of bubble flux |
|------------------------------|-------------|------------------------|------------|------------------------------------------------------------|---------------------------------------------------------------|----------|-------------|-------------|------------|---------------------|
| 1                            | 61          | 0.090                  | 11.1       | 14.10                                                      | 1.27                                                          | 4.14     | 0.37        | 0.73        | 3.2        | 0.54                |
| 2                            | 54          | 0.12                   | 8.2        | 1.90                                                       | 0.23                                                          | 9.7      | 1.16        | 0.97        | 9.9        | 0.14                |
| 3                            | 56          | 0.069                  | 14.5       | 7.40                                                       | 0.51                                                          | 6.6      | 0.46        | 0.75        | 5.1        | 0.51                |
| 4                            | 49          | 0.085                  | 11.7       | 5.62                                                       | 0.48                                                          | 6.7      | 0.57        | 0.77        | 5.5        | 0.42                |
| 5                            | 61          | 0.074                  | 13.6       | 13.16                                                      | 0.97                                                          | 4.7      | 0.35        | 0.72        | 3.6        | 0.62                |
| 6                            | 51          | 0.078                  | 12.8       | 1.23                                                       | 0.096                                                         | 15.0     | 1.17        | 0.96        | 15.2       | 0.14                |
| 7                            | 59          | 0.051                  | 19.7       | 2.51                                                       | 0.13                                                          | 12.9     | 0.66        | 0.8         | 10.0       | 0.36                |
| 8                            | 54          | 0.067                  | 15.0       | 1.86                                                       | 0.12                                                          | 13.5     | 0.90        | 0.85        | 11.8       | 0.21                |
| 9                            | 45          | 0.085                  | 11.7       | 0.21                                                       | 0.018                                                         | 34.7     | 2.95        | no bubbles  | no bubbles | 0                   |
| Average value for places 1-8 |             | 0.08                   | 13.3       | 6.0                                                        | 0.50                                                          | 9.2      | 0.71        | 0.82        | 8.0        | 0.37                |
